# Supplementary material
Source: publisher figshare collection journal article supplement (https://acs.figshare.com/ndownloader/files/17926607)
Supplement: Supplementary file 1 [file 17926607]

Compound_ID	SMILES
A1	O=C(CCCN1CCC(C2=CC=C(Cl)C=C2)(O)CC1)C3=CC(CCCCC4)=C4C=C3
A2	O=C(CCC(N1CCC(C2=CC=C(Cl)C=C2)(O)CC1)=O)C3=CC(CCCCC4)=C4C=C3
A3	OC(CC1)(C2=CC=C(Cl)C=C2)CCN1C(CCCC3=CC(CCCCC4)=C4C=C3)=O
B1	OC1(C2=CC=C(Cl)C=C2)CCN(CCCC3=CC(CCCCC4)=C4C=C3)CC1.Cl
B2	OC(CC1)(C2=CC=C(Cl)C=C2)CCN1CCCCC3=CC(CCCCC4)=C4C=C3.Cl
B3	OC(CC1)(C2=CC=C(Cl)C=C2)CCN1CCCCCC3=CC(CCCCC4)=C4C=C3.Cl
B4	OC(CC1)(C2=CC=C(Cl)C=C2)CCN1CCCCCCC3=CC(CCCCC4)=C4C=C3.Cl
B5	OC(CC1)(C2=CC=C(Cl)C=C2)CCN1CCCCCCCC3=CC(CCCCC4)=C4C=C3.Cl
B6	OC(CC1)(C2=CC=C(Cl)C=C2)CCN1CCCCC3=CC(CCC4)=C4C=C3.Cl
B7	OC(CC1)(C2=CC=C(Cl)C=C2)CCN1CCCCC3=CC(CCCC4)=C4C=C3.Cl
B8	ClC(C=C1)=CC=C1N(CC2)CCN2CCCCC3=CC(CCCCC4)=C4C=C3.Cl
B9	ClC(C=C1)=CC=C1C(CC2)CCN2CCCCC3=CC(CCCCC4)=C4C=C3.Cl
B10	FC(C=C1)=CC=C1C(CC2)(O)CCN2CCCCC3=CC(CCCCC4)=C4C=C3.Cl
B11	OC(CC1)(C2=CC=C(C(F)(F)F)C=C2)CCN1CCCCC3=CC(CCCCC4)=C4C=C3.Cl
B12	OC(CC1)(C2=CN=CC=C2)CCN1CCCCC3=CC(CCCCC4)=C4C=C3.Cl
B13	CC(C=C1)=CC=C1C(CC2)(O)CCN2CCCCC3=CC(CCCCC4)=C4C=C3.Cl
B14	OC(CC1)(C2=CC=C(C3=CC=CC=C3)C=C2)CCN1CCCCC4=CC(CCCCC5)=C5C=C4.Cl
B15	OC(CC1)(C2=CC=C(OC)C=C2)CCN1CCCCC3=CC(CCCCC4)=C4C=C3.Cl
B16	OC(CC1)(C2=CC(C=CC=C3)=C3C=C2)CCN1CCCCC4=CC(CCCCC5)=C5C=C4.Cl
B17	OC(CC1)(C2=C(C=CC=C3)C3=CC=C2)CCN1CCCCC4=CC(CCCCC5)=C5C=C4.Cl
B18	OC(CC1)(C2=CC=C(N3CCOCC3)C=C2)CCN1CCCCC4=CC(CCCCC5)=C5C=C4.Cl
